# Supplementary material
Source: ML conference proceedings conference paper supplement (https://openaccess.thecvf.com/content/ICCV2023/html/Guizilini_Towards_Zero-Shot_Scale-Aware_ICCV_2023_paper.html)
Supplement: Supplementary file 1 [file Guizilini_Towards_Zero-Shot_Scale-Aware_ICCV_2023_supplemental.zip]

Archive with 2 entries (2 files):
- 04232-supp.mp4
- 04232-supp.pdf
